# Supplementary material for: Ivabradine Induces Cardiac Protection against Myocardial Infarction by Preventing Cyclophilin-A Secretion in Pigs under Coronary Ischemia/Reperfusion
Source: PubMed Central journal article supplement (PMC8001911; doi:10.3390/ijms22062902), 2021-03-12
Supplement: ijms-22-02902-s001.pdf [file ijms-22-02902-s001.pdf]

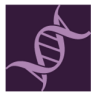

## Supplementary Material

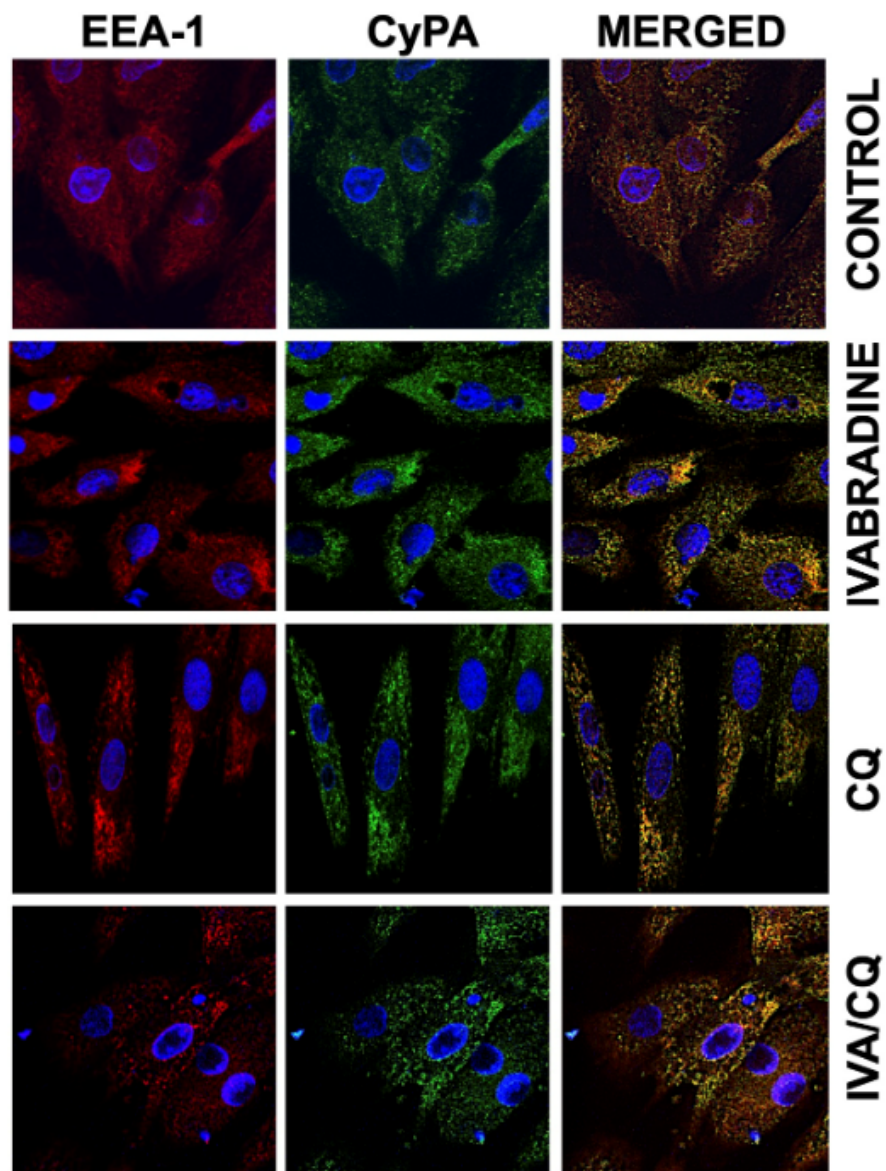

**Figure 1.** Confocal microscopy detection of EEA-1 (red) and CyPA (green) in H9c2 cells cultured under hypoxic conditions and incubated with Ivabradine, Chloroquine and a combination of both. Merged panels show co-localization in yellow.  $n = 3$ .
